# Supplementary material for: Reactivity of multi-site bound allenylidene towards alkynes and silica gel †
Source: Royal Society of Chemistry journal article supplement (doi:10.1039/b006780f), 2001-01-01
Supplement: b006780f.doc [file b006780f.doc]

Structure report for **5b**

Crystallographic data are presented in Tables 1–5. A single crystal of **5b** was coated in high-vacuum grease and mounted on a glass fibre. X-Ray measurements were made using a Bruker SMART CCD area-detector diffractometer with Mo-K radiation (** = 0.71073 Å).1 Intensities were integrated2 from several series of exposures, each exposure covering 0.3° in **, and the total data set being a sphere. Absorption corrections were applied, based on multiple and symmetry-equivalent measurements.3 The structure was solved by direct methods and refined by least squares on weighted *F*2 values for all reflections (see Table 1).4

 All non-hydrogen atoms were assigned anisotropic displacement parameters and refined without positional constraints. All hydrogen atoms were constrained to ideal geometries and refined with fixed isotropic displacement parameters.

 Refinement proceeded smoothly to give the residuals shown in Table 1. Complex neutral-atom scattering factors were used.5

__________________________

**References**

1. SMART diffractometer control software, Bruker Analytical X-Ray Instruments Inc., Madison, WI, 1998.

2. SAINT integration software, Siemens Analytical X-Ray Instruments Inc., Madison, WI, 1994.

3. G. M. Sheldrick, SADABS: A program for absorption correction with the Siemens SMART system, University of Göttingen, Germany, 1996.

4. SHELXTL program system version 5.1, Bruker Analytical X-Ray Instruments Inc., Madison, WI, 1998.

5. International Tables for Crystallography, Kluwer, Dordrecht, 1992, vol. C.

**Table 1** Crystal data and structure refinement for **5b**

Identification code **5b**

Empirical formula C38H20O9Ru3

Formula weight 923.75

Temperature 173(2) K

Wavelength 0.71073 Å

Crystal system Monoclinic

Space group *P*21/*n*

Unit cell dimensions *a* = 13.279(2) Å ** = 90°

*b* = 17.3738(16) Å ** = 102.732(9)°

*c* = 15.161(2) Å ** = 90°

Volume 3411.7(8) Å3

*Z* 4

Density (calculated) 1.798 Mg m–3

Absorption coefficient 1.367 mm–1

*F*(000) 1808

Crystal size 0.5 × 0.3 × 0.02 mm

** range for data collection 1.81 to 27.49°

Index ranges –17 ≤ *h* ≤ 17, –22 ≤ *k* ≤ 22, –19 ≤ *l* ≤ 19

Reflections collected 35148

Independent reflections 7834 [*R*int = 0.0368]

Completeness to  = 27.49° 100.0%

Absorption correction Semi-empirical from equivalents

Max. and min. transmission 0.983 and 0.735

Refinement method Full matrix least-squares on *F*2

Data/restraints/parameters 7834/0/451

Goodness-of-fit on *F*2 *S* = 0.984

*R* indices [for 6324 reflections with *I*>2**(*I*)] *R*1 = 0.0222, *wR*2 = 0.0488

*R* indices (for all 7834 data) *R*1 = 0.0342, *wR*2 = 0.0515

Weighting scheme *w*–1 = **2(*F*o2) + (*aP*)2,

where *P* = [max(*F*o2, 0) + 2*F*c2]/3

*a* = 0.0276

Largest diff. peak and hole 0.377 and –0.541 eÅ–3

**Table 2** Atomic coordinates (× 104) and equivalent isotropic displacement parameters (Å2 × 103) for **5b**. *U*(eq) is defined as one third of the trace of the orthogonalized *Uij* tensor

________________________________________________________________________________

*x* *y* *z* *U*(eq)

________________________________________________________________________________

Ru(1) 3170(1) 6071(1) 8257(1) 23(1)

Ru(2) 2002(1) 5533(1) 6673(1) 21(1)

Ru(3) 53(1) 7304(1) 6823(1) 22(1)

C(1) 4563(2) 5612(1) 8523(2) 32(1)

C(2) 2933(2) 5732(2) 9422(2) 36(1)

C(3) 3596(2) 7070(2) 8661(2) 34(1)

C(4) 2398(2) 5131(1) 5618(2) 30(1)

C(5) 690(2) 5015(1) 6340(2) 32(1)

C(6) 2582(2) 4747(1) 7519(2) 33(1)

C(7) 207(2) 8145(1) 6023(2) 28(1)

C(8) –569(2) 6609(1) 5894(2) 32(1)

C(9) –1258(2) 7743(1) 7001(2) 32(1)

C(11) 3237(2) 6422(1) 6926(1) 21(1)

C(12) 2335(2) 6816(1) 6428(1) 21(1)

C(14) 1484(2) 6796(1) 6862(1) 21(1)

C(15) 1626(2) 6363(1) 7668(1) 20(1)

C(16) 621(2) 6438(1) 7980(1) 21(1)

C(17) 480(2) 7161(1) 8413(1) 23(1)

C(18) 982(2) 7845(1) 8186(1) 25(1)

C(19) 684(2) 8574(1) 8476(2) 33(1)

C(20) –42(2) 8630(1) 8978(2) 37(1)

C(21) –495(2) 7957(1) 9245(2) 33(1)

C(22) –244(2) 7255(1) 8980(2) 27(1)

C(23) 12(2) 5746(1) 8152(1) 24(1)

C(24) 502(2) 5093(1) 8572(2) 35(1)

C(25) –63(2) 4466(1) 8762(2) 44(1)

C(26) –1116(2) 4479(2) 8539(2) 46(1)

C(27) –1627(2) 5109(2) 8095(2) 46(1)

C(28) –1061(2) 5737(1) 7906(2) 36(1)

C(29) 4248(2) 6454(1) 6658(1) 22(1)

C(30) 4755(2) 5804(1) 6449(2) 31(1)

C(31) 5726(2) 5847(2) 6254(2) 36(1)

C(32) 6222(2) 6551(2) 6273(2) 36(1)

C(33) 5738(2) 7201(1) 6494(2) 33(1)

C(34) 4768(2) 7154(1) 6690(2) 28(1)

C(35) 2235(2) 7230(1) 5543(1) 22(1)

C(36) 2613(2) 7977(1) 5523(2) 26(1)

C(37) 2464(2) 8386(1) 4724(2) 32(1)

C(38) 1938(2) 8058(2) 3925(2) 36(1)

C(39) 1554(2) 7318(2) 3928(2) 37(1)

C(40) 1699(2) 6908(1) 4734(2) 31(1)

O(1) 5352(1) 5336(1) 8674(1) 50(1)

O(2) 2829(2) 5596(1) 10124(1) 62(1)

O(3) 3854(2) 7682(1) 8857(1) 56(1)

O(4) 2646(1) 4922(1) 4992(1) 47(1)

O(5) –59(1) 4676(1) 6157(1) 50(1)

O(6) 2779(2) 4154(1) 7849(1) 44(1)

O(7) 284(1) 8639(1) 5547(1) 41(1)

O(8) –942(2) 6200(1) 5332(1) 50(1)

O(9) –1998(1) 8028(1) 7082(1) 51(1)

________________________________________________________________________________

**Table 3** Bond lengths (Å) and angles (°) for **5b**

_____________________________________________________

Ru(1)–C(3) 1.885(3)

Ru(1)–C(2) 1.952(2)

Ru(1)–C(1) 1.972(3)

Ru(1)–C(15) 2.110(2)

Ru(1)–C(11) 2.130(2)

Ru(1)–C(6) 2.602(2)

Ru(1)–Ru(2) 2.7215(4)

Ru(2)–C(6) 1.916(2)

Ru(2)–C(4) 1.921(2)

Ru(2)–C(5) 1.927(2)

Ru(2)–C(15) 2.222(2)

Ru(2)–C(11) 2.224(2)

Ru(2)–C(12) 2.318(2)

Ru(2)–C(14) 2.336(2)

Ru(3)–C(8) 1.901(3)

Ru(3)–C(7) 1.938(2)

Ru(3)–C(9) 1.973(2)

Ru(3)–C(14) 2.085(2)

Ru(3)–C(16) 2.309(2)

Ru(3)–C(18) 2.357(2)

Ru(3)–C(17) 2.365(2)

C(1)–O(1) 1.130(3)

C(2)–O(2) 1.128(3)

C(3)–O(3) 1.137(3)

C(4)–O(4) 1.131(3)

C(5)–O(5) 1.137(3)

C(6)–O(6) 1.150(3)

C(7)–O(7) 1.140(3)

C(8)–O(8) 1.136(3)

C(9)–O(9) 1.130(3)

C(11)–C(12) 1.440(3)

C(11)–C(29) 1.487(3)

C(12)–C(14) 1.428(3)

C(12)–C(35) 1.502(3)

C(14)–C(15) 1.411(3)

C(15)–C(16) 1.517(3)

C(16)–C(17) 1.448(3)

C(16)–C(23) 1.504(3)

C(17)–C(22) 1.433(3)

C(17)–C(18) 1.441(3)

C(18)–C(19) 1.425(3)

C(19)–C(20) 1.357(3)

C(20)–C(21) 1.414(3)

C(21)–C(22) 1.348(3)

C(23)–C(24) 1.390(3)

C(23)–C(28) 1.390(3)

C(24)–C(25) 1.388(3)

C(25)–C(26) 1.364(4)

C(26)–C(27) 1.382(4)

C(27)–C(28) 1.390(3)

C(29)–C(30) 1.386(3)

C(29)–C(34) 1.395(3)

C(30)–C(31) 1.388(3)

C(31)–C(32) 1.386(3)

C(32)–C(33) 1.378(3)

C(33)–C(34) 1.386(3)

C(35)–C(40) 1.392(3)

C(35)–C(36) 1.395(3)

C(36)–C(37) 1.380(3)

C(37)–C(38) 1.381(3)

C(38)–C(39) 1.383(4)

C(39)–C(40) 1.390(3)

C(3)–Ru(1)–C(2) 94.62(11)

C(3)–Ru(1)–C(1) 96.05(10)

C(2)–Ru(1)–C(1) 91.40(10)

C(3)–Ru(1)–C(15) 96.27(9)

C(2)–Ru(1)–C(15) 96.90(9)

C(1)–Ru(1)–C(15) 164.53(9)

C(3)–Ru(1)–C(11) 88.35(9)

C(2)–Ru(1)–C(11) 173.19(9)

C(1)–Ru(1)–C(11) 94.38(9)

C(15)–Ru(1)–C(11) 76.66(8)

C(3)–Ru(1)–C(6) 173.57(9)

C(2)–Ru(1)–C(6) 91.72(10)

C(1)–Ru(1)–C(6) 84.81(9)

C(15)–Ru(1)–C(6) 81.92(8)

C(11)–Ru(1)–C(6) 85.23(7)

C(3)–Ru(1)–Ru(2) 132.37(7)

C(2)–Ru(1)–Ru(2) 121.41(8)

C(1)–Ru(1)–Ru(2) 111.59(7)

C(15)–Ru(1)–Ru(2) 52.95(6)

C(11)–Ru(1)–Ru(2) 52.87(6)

C(6)–Ru(1)–Ru(2) 42.11(5)

C(6)–Ru(2)–C(4) 98.87(10)

C(6)–Ru(2)–C(5) 92.81(10)

C(4)–Ru(2)–C(5) 90.54(10)

C(6)–Ru(2)–C(15) 97.21(9)

C(4)–Ru(2)–C(15) 160.88(9)

C(5)–Ru(2)–C(15) 98.94(8)

C(6)–Ru(2)–C(11) 101.99(9)

C(4)–Ru(2)–C(11) 94.01(9)

C(5)–Ru(2)–C(11) 163.64(9)

C(15)–Ru(2)–C(11) 72.51(7)

C(6)–Ru(2)–C(12) 136.92(9)

C(4)–Ru(2)–C(12) 96.91(9)

C(5)–Ru(2)–C(12) 126.90(9)

C(15)–Ru(2)–C(12) 64.13(7)

C(11)–Ru(2)–C(12) 36.91(7)

C(6)–Ru(2)–C(14) 132.33(9)

C(4)–Ru(2)–C(14) 125.90(9)

C(5)–Ru(2)–C(14) 101.36(9)

C(15)–Ru(2)–C(14) 35.96(7)

C(11)–Ru(2)–C(14) 63.41(7)

C(12)–Ru(2)–C(14) 35.73(7)

C(6)–Ru(2)–Ru(1) 65.61(7)

C(4)–Ru(2)–Ru(1) 130.73(7)

C(5)–Ru(2)–Ru(1) 134.25(7)

C(15)–Ru(2)–Ru(1) 49.26(5)

C(11)–Ru(2)–Ru(1) 49.78(5)

C(12)–Ru(2)–Ru(1) 73.72(5)

C(14)–Ru(2)–Ru(1) 72.24(5)

C(8)–Ru(3)–C(7) 95.98(10)

C(8)–Ru(3)–C(9) 95.43(10)

C(7)–Ru(3)–C(9) 90.73(10)

C(8)–Ru(3)–C(14) 89.79(9)

C(7)–Ru(3)–C(14) 96.64(9)

C(9)–Ru(3)–C(14) 170.48(9)

C(8)–Ru(3)–C(16) 99.45(9)

C(7)–Ru(3)–C(16) 154.82(9)

C(9)–Ru(3)–C(16) 107.37(9)

C(14)–Ru(3)–C(16) 63.81(8)

C(8)–Ru(3)–C(18) 163.97(9)

C(7)–Ru(3)–C(18) 98.15(9)

C(9)–Ru(3)–C(18) 91.93(9)

C(14)–Ru(3)–C(18) 81.11(8)

C(16)–Ru(3)–C(18) 64.70(7)

C(8)–Ru(3)–C(17) 130.96(9)

C(7)–Ru(3)–C(17) 133.06(9)

C(9)–Ru(3)–C(17) 85.53(9)

C(14)–Ru(3)–C(17) 85.04(8)

C(16)–Ru(3)–C(17) 36.07(7)

C(18)–Ru(3)–C(17) 35.53(7)

O(1)–C(1)–Ru(1) 178.7(2)

O(2)–C(2)–Ru(1) 174.0(3)

O(3)–C(3)–Ru(1) 176.3(2)

O(4)–C(4)–Ru(2) 177.3(2)

O(5)–C(5)–Ru(2) 176.5(2)

O(6)–C(6)–Ru(2) 161.8(2)

O(6)–C(6)–Ru(1) 125.92(19)

Ru(2)–C(6)–Ru(1) 72.28(8)

O(7)–C(7)–Ru(3) 179.1(2)

O(8)–C(8)–Ru(3) 179.2(2)

O(9)–C(9)–Ru(3) 176.5(2)

C(12)–C(11)–C(29) 122.48(18)

C(12)–C(11)–Ru(1) 115.39(14)

C(29)–C(11)–Ru(1) 119.87(14)

C(12)–C(11)–Ru(2) 75.10(12)

C(29)–C(11)–Ru(2) 130.87(15)

Ru(1)–C(11)–Ru(2) 77.35(7)

C(14)–C(12)–C(11) 113.48(18)

C(14)–C(12)–C(35) 120.04(19)

C(11)–C(12)–C(35) 126.48(19)

C(14)–C(12)–Ru(2) 72.83(12)

C(11)–C(12)–Ru(2) 67.99(11)

C(35)–C(12)–Ru(2) 128.35(14)

C(15)–C(14)–C(12) 116.33(19)

C(15)–C(14)–Ru(3) 101.41(14)

C(12)–C(14)–Ru(3) 141.76(16)

C(15)–C(14)–Ru(2) 67.63(11)

C(12)–C(14)–Ru(2) 71.44(11)

Ru(3)–C(14)–Ru(2) 133.30(10)

C(14)–C(15)–C(16) 105.38(17)

C(14)–C(15)–Ru(1) 115.29(14)

C(16)–C(15)–Ru(1) 136.74(15)

C(14)–C(15)–Ru(2) 76.42(12)

C(16)–C(15)–Ru(2) 127.75(14)

Ru(1)–C(15)–Ru(2) 77.79(7)

C(17)–C(16)–C(23) 119.10(18)

C(17)–C(16)–C(15) 115.22(18)

C(23)–C(16)–C(15) 122.00(18)

C(17)–C(16)–Ru(3) 74.08(12)

C(23)–C(16)–Ru(3) 123.71(15)

C(15)–C(16)–Ru(3) 88.94(12)

C(22)–C(17)–C(18) 117.11(19)

C(22)–C(17)–C(16) 122.81(19)

C(18)–C(17)–C(16) 119.62(18)

C(22)–C(17)–Ru(3) 123.89(16)

C(18)–C(17)–Ru(3) 71.92(12)

C(16)–C(17)–Ru(3) 69.85(11)

C(19)–C(18)–C(17) 119.0(2)

C(19)–C(18)–Ru(3) 119.79(16)

C(17)–C(18)–Ru(3) 72.54(12)

C(20)–C(19)–C(18) 121.2(2)

C(19)–C(20)–C(21) 120.0(2)

C(22)–C(21)–C(20) 120.9(2)

C(21)–C(22)–C(17) 121.6(2)

C(24)–C(23)–C(28) 117.6(2)

C(24)–C(23)–C(16) 121.1(2)

C(28)–C(23)–C(16) 121.4(2)

C(25)–C(24)–C(23) 121.0(2)

C(26)–C(25)–C(24) 120.4(2)

C(25)–C(26)–C(27) 120.1(2)

C(26)–C(27)–C(28) 119.4(2)

C(27)–C(28)–C(23) 121.5(2)

C(30)–C(29)–C(34) 117.2(2)

C(30)–C(29)–C(11) 123.1(2)

C(34)–C(29)–C(11) 119.50(19)

C(29)–C(30)–C(31) 121.8(2)

C(32)–C(31)–C(30) 120.1(2)

C(33)–C(32)–C(31) 119.0(2)

C(32)–C(33)–C(34) 120.6(2)

C(33)–C(34)–C(29) 121.3(2)

C(40)–C(35)–C(36) 118.0(2)

C(40)–C(35)–C(12) 121.52(19)

C(36)–C(35)–C(12) 120.26(19)

C(37)–C(36)–C(35) 121.0(2)

C(36)–C(37)–C(38) 120.3(2)

C(37)–C(38)–C(39) 119.8(2)

C(38)–C(39)–C(40) 119.9(2)

C(39)–C(40)–C(35) 120.9(2)

_____________________________________________________________

Symmetry transformations used to generate equivalent atoms.

**Table 4** Anisotropic displacement parameters (Å2 × 103) for **5b**.

The anisotropic displacement factor exponent takes the form:

–22[*h*2*a**2*U*11 + ... + 2 *hka*b*U*12]

______________________________________________________________________________

*U*11 *U*22 *U*33 *U*23 *U*13 *U*12

______________________________________________________________________________

Ru(1) 20(1) 30(1) 21(1) 3(1) 5(1) 1(1)

Ru(2) 21(1) 21(1) 23(1) –2(1) 8(1) 0(1)

Ru(3) 18(1) 24(1) 22(1) 0(1) 5(1) 1(1)

C(1) 29(1) 38(1) 29(1) 6(1) 5(1) –1(1)

C(2) 26(1) 52(2) 30(1) 8(1) 4(1) 2(1)

C(3) 28(1) 46(2) 28(1) –3(1) 2(1) 1(1)

C(4) 27(1) 30(1) 35(1) –2(1) 10(1) –1(1)

C(5) 33(1) 30(1) 36(1) –9(1) 13(1) –2(1)

C(6) 33(1) 35(1) 37(1) 4(1) 19(1) 4(1)

C(7) 22(1) 32(1) 28(1) –4(1) 4(1) 3(1)

C(8) 30(1) 34(1) 30(1) 4(1) 5(1) –1(1)

C(9) 25(1) 34(1) 36(1) 0(1) 5(1) 1(1)

C(11) 21(1) 22(1) 21(1) –1(1) 6(1) –1(1)

C(12) 23(1) 21(1) 20(1) –2(1) 5(1) –1(1)

C(14) 20(1) 21(1) 21(1) –5(1) 4(1) 0(1)

C(15) 19(1) 20(1) 23(1) –2(1) 7(1) 0(1)

C(16) 20(1) 25(1) 19(1) 1(1) 5(1) 1(1)

C(17) 21(1) 28(1) 20(1) 1(1) 5(1) 1(1)

C(18) 26(1) 27(1) 23(1) –3(1) 10(1) –4(1)

C(19) 42(2) 23(1) 36(1) –4(1) 13(1) –7(1)

C(20) 46(2) 29(1) 41(2) –8(1) 19(1) 3(1)

C(21) 35(1) 38(1) 30(1) –4(1) 17(1) 0(1)

C(22) 26(1) 30(1) 27(1) –2(1) 11(1) –3(1)

C(23) 24(1) 25(1) 27(1) –3(1) 12(1) –2(1)

C(24) 28(1) 35(1) 44(2) 6(1) 12(1) –2(1)

C(25) 42(2) 29(1) 64(2) 10(1) 21(1) 2(1)

C(26) 43(2) 30(1) 74(2) –2(1) 30(2) –10(1)

C(27) 26(1) 40(2) 75(2) –3(1) 16(1) –6(1)

C(28) 28(1) 34(1) 48(2) 3(1) 9(1) –1(1)

C(29) 20(1) 28(1) 19(1) 1(1) 3(1) 0(1)

C(30) 28(1) 27(1) 42(1) –4(1) 13(1) –3(1)

C(31) 27(1) 37(1) 47(2) –6(1) 16(1) 3(1)

C(32) 22(1) 48(2) 41(2) 1(1) 11(1) –3(1)

C(33) 27(1) 34(1) 38(1) 4(1) 5(1) –8(1)

C(34) 25(1) 26(1) 32(1) –2(1) 5(1) 0(1)

C(35) 20(1) 27(1) 22(1) 2(1) 8(1) 4(1)

C(36) 26(1) 28(1) 26(1) 0(1) 8(1) 2(1)

C(37) 32(1) 30(1) 38(1) 8(1) 12(1) 2(1)

C(38) 37(1) 45(2) 27(1) 14(1) 12(1) 9(1)

C(39) 37(2) 50(2) 24(1) 4(1) 3(1) –3(1)

C(40) 33(1) 34(1) 26(1) 2(1) 6(1) –6(1)

O(1) 28(1) 57(1) 61(1) 12(1) 6(1) 12(1)

O(2) 47(1) 109(2) 32(1) 22(1) 11(1) –2(1)

O(3) 53(1) 45(1) 64(1) –21(1) 1(1) –9(1)

O(4) 49(1) 58(1) 38(1) –16(1) 21(1) 1(1)

O(5) 38(1) 50(1) 63(1) –21(1) 15(1) –19(1)

O(6) 60(1) 31(1) 47(1) 10(1) 21(1) 10(1)

O(7) 40(1) 41(1) 41(1) 14(1) 8(1) 4(1)

O(8) 62(1) 43(1) 38(1) –8(1) –4(1) –12(1)

O(9) 28(1) 59(1) 70(1) –1(1) 15(1) 12(1)

______________________________________________________________________________

**Table 5** Hydrogen coordinates (× 104) and isotropic displacement parameters (Å2 × 103) for **5b**

________________________________________________________________________________

*x* *y* *z* *U*(eq)

________________________________________________________________________________

H(18) 1505 7810 7849 29

H(19) 999 9028 8315 39

H(20) –247 9122 9149 45

H(21) –982 8000 9617 39

H(22) –554 6812 9174 32

H(24) 1235 5075 8730 42

H(25) 286 4025 9050 52

H(26) –1498 4055 8689 55

H(27) –2360 5113 7921 56

H(28) –1415 6169 7601 44

H(30) 4428 5317 6438 38

H(31) 6053 5393 6108 43

H(32) 6885 6584 6136 44

H(33) 6072 7687 6512 40

H(34) 4452 7609 6849 33

H(36) 2979 8208 6067 31

H(37) 2725 8895 4724 39

H(38) 1840 8339 3376 43

H(39) 1191 7090 3380 45

H(40) 1429 6402 4732 37

________________________________________________________________________________
